# Supplementary material
Source: publisher figshare collection journal article supplement (https://asha.figshare.com/articles/dataset/_/14226641)

Supplemental Material S1. Individual performance for participants identified as responders (effect size > 0) across baseline and treatment sessions for target and control words. The treatment condition for each participant (brief, i.e., 4 words or fewer; extended, i.e., 5 words or more) is indicated at the top of each graph.

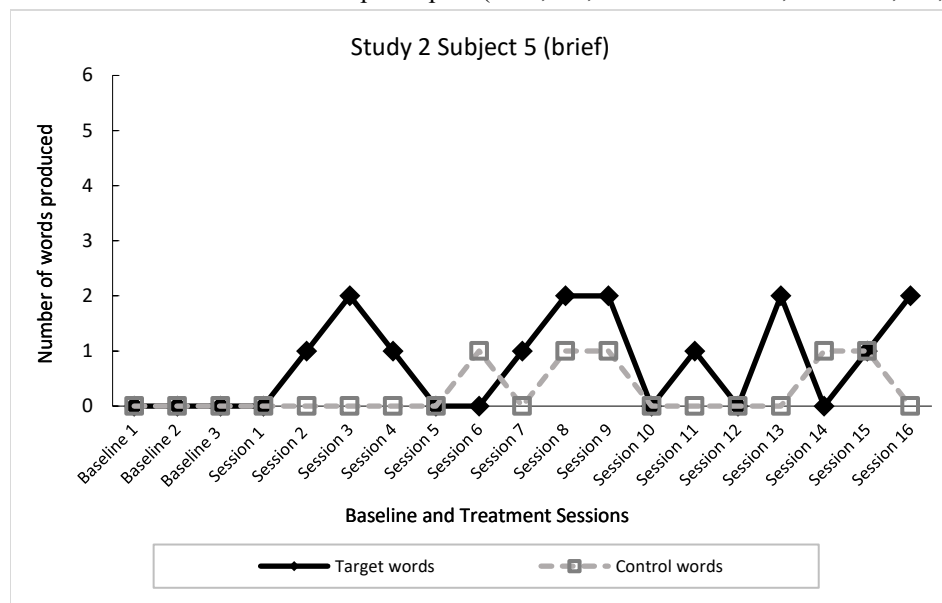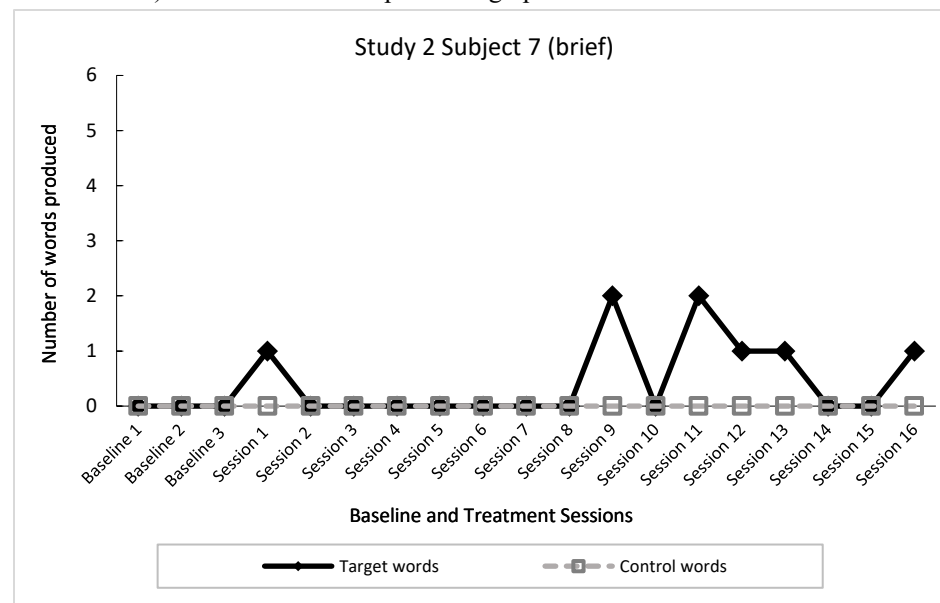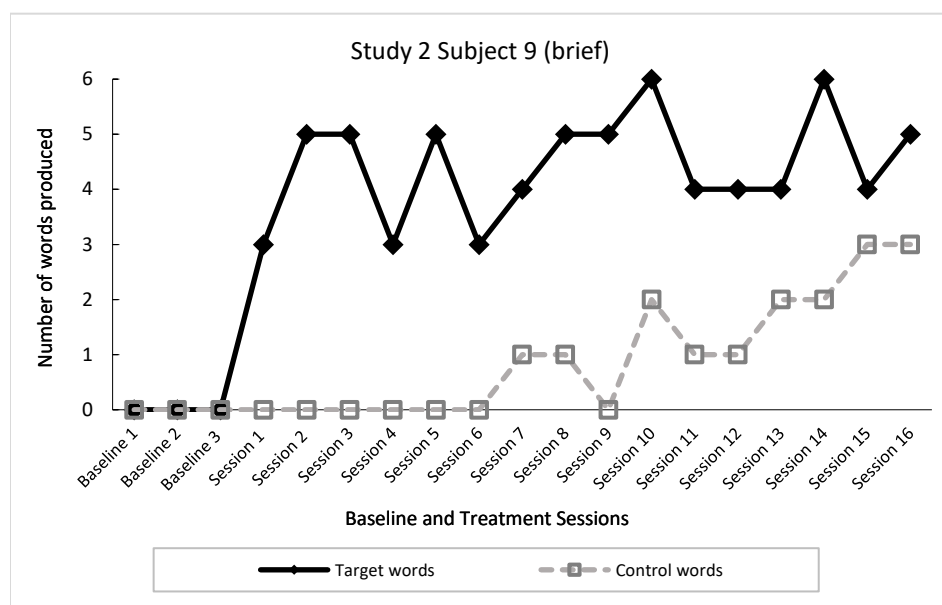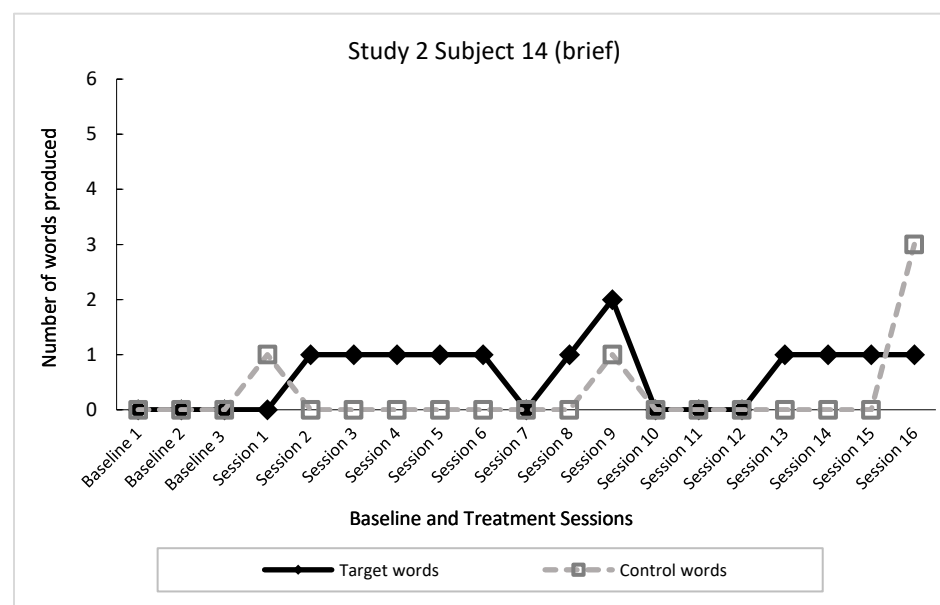

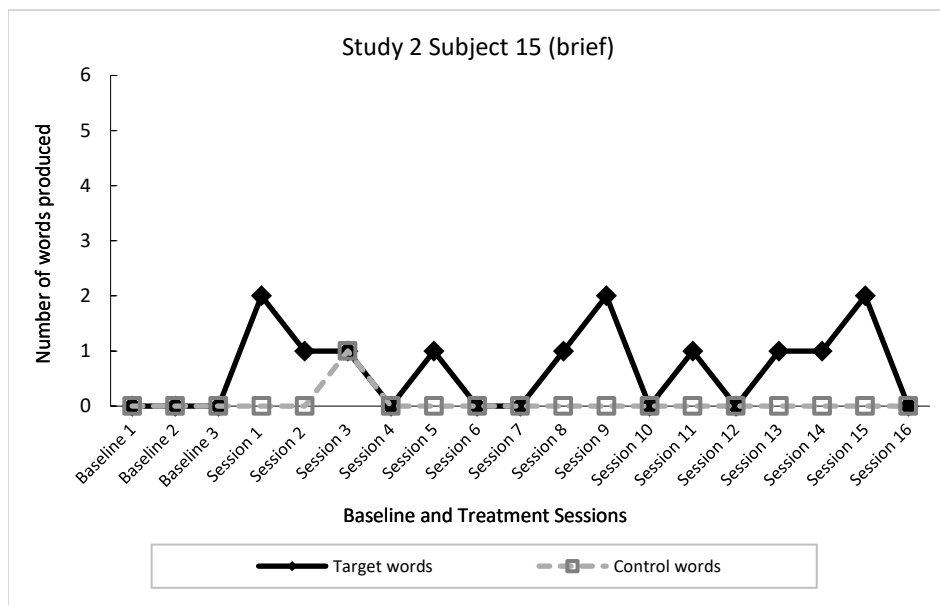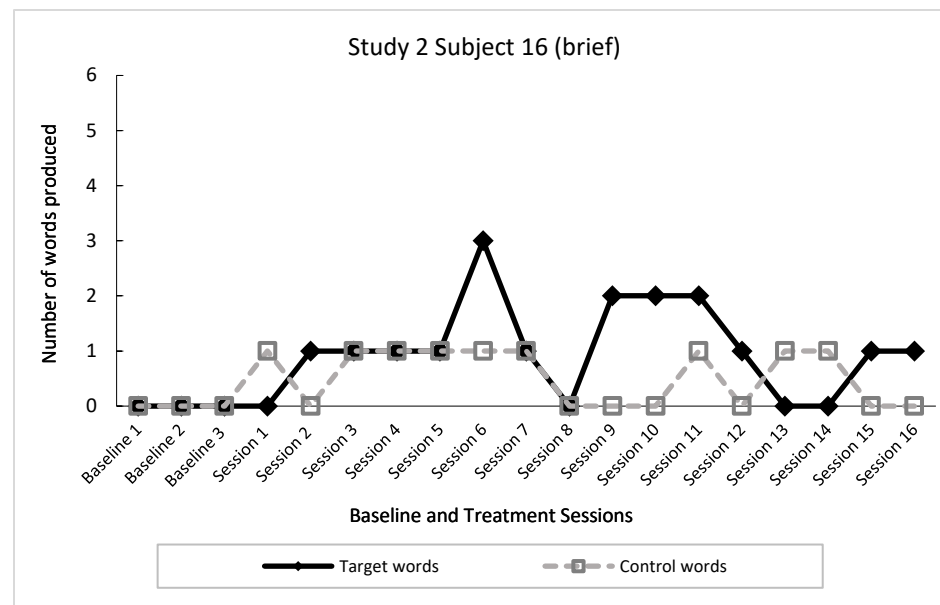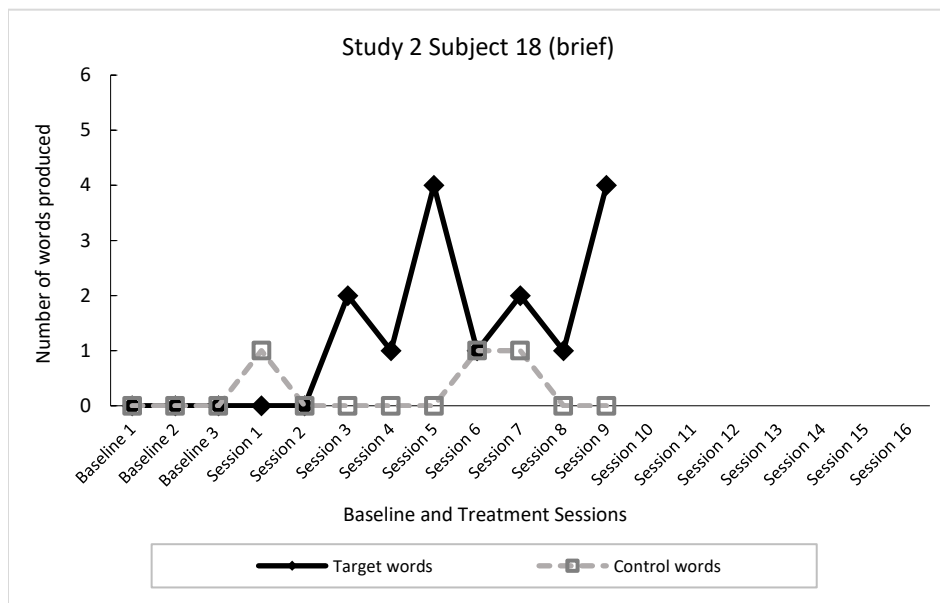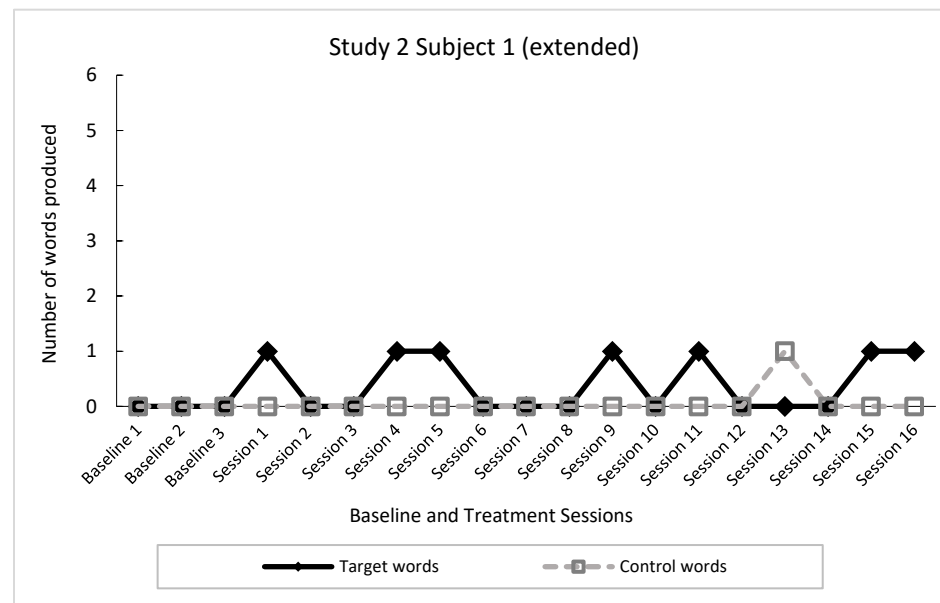

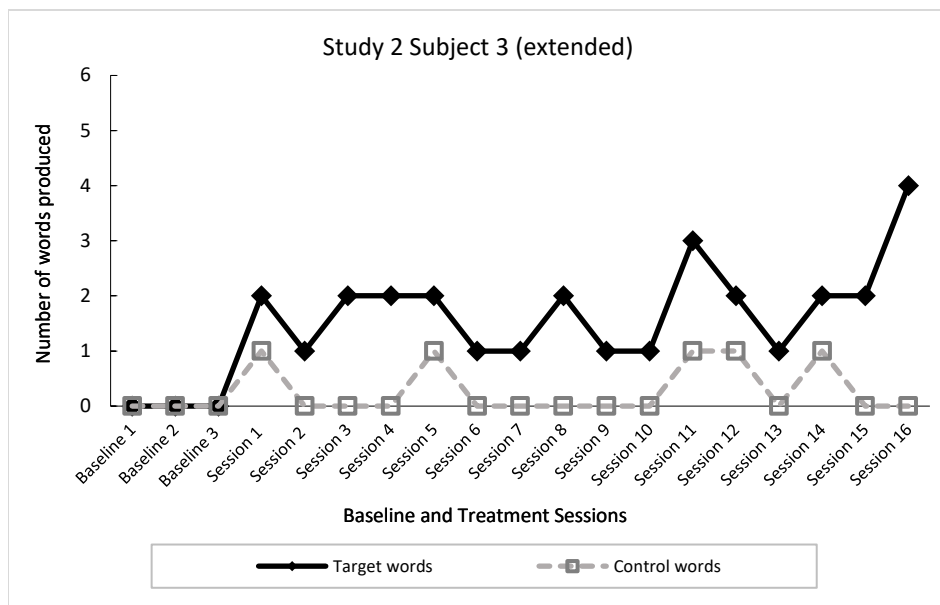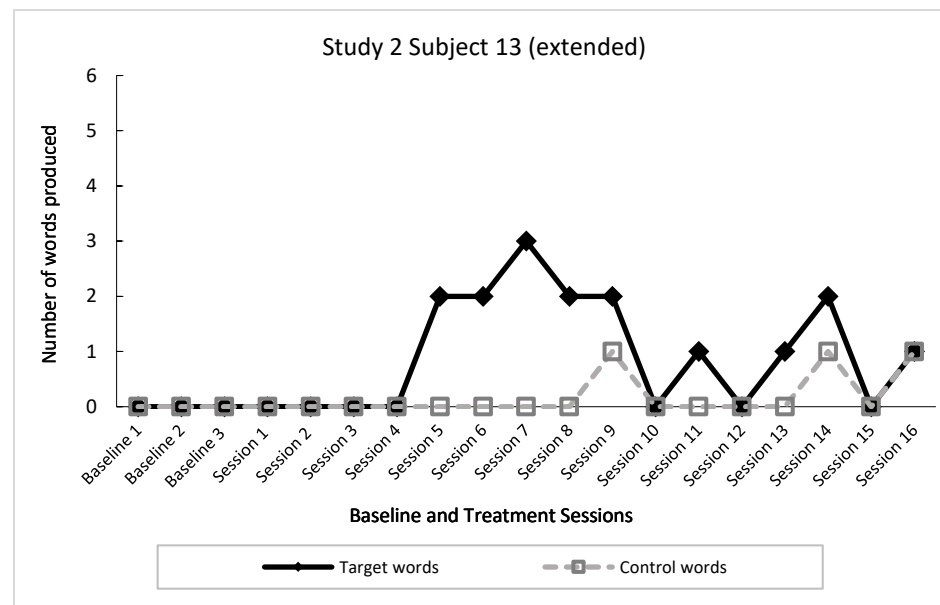

Supplement: Supplementary file 1 [file 1]
