# Supplementary material
Source: publisher figshare collection journal article supplement (https://asha.figshare.com/articles/dataset/_/14226641)

Supplemental Material S2. Individual performance for participants identified as nonresponders across baseline and treatment sessions for target and control words. The treatment condition for each participant (brief, i.e., 4 words or fewer; extended, i.e., 5 words or more) is indicated at the top of each graph.

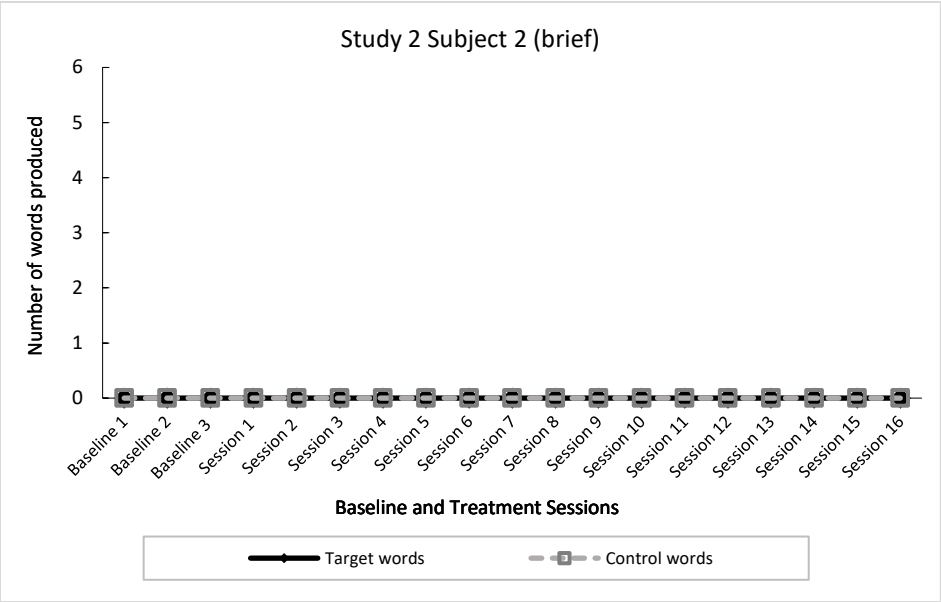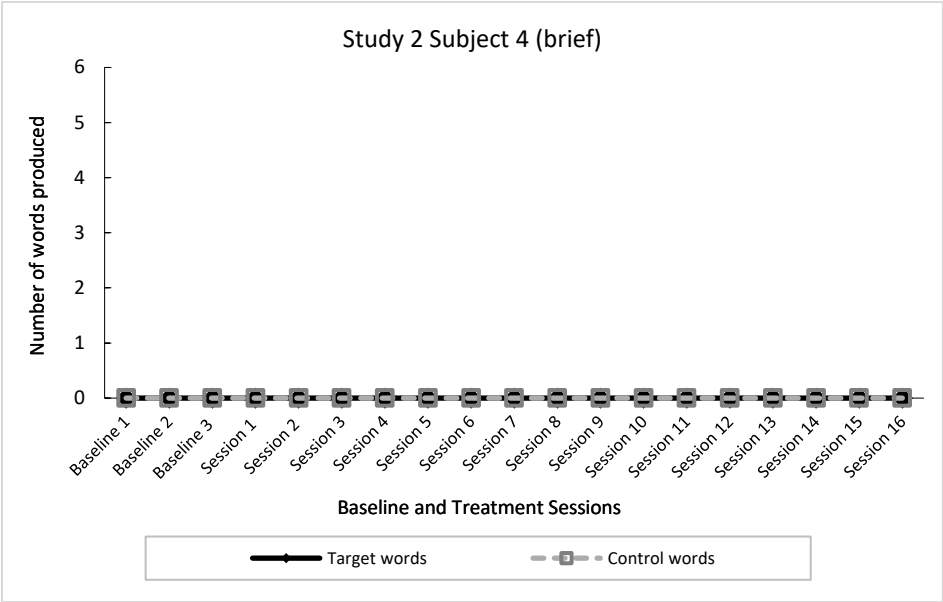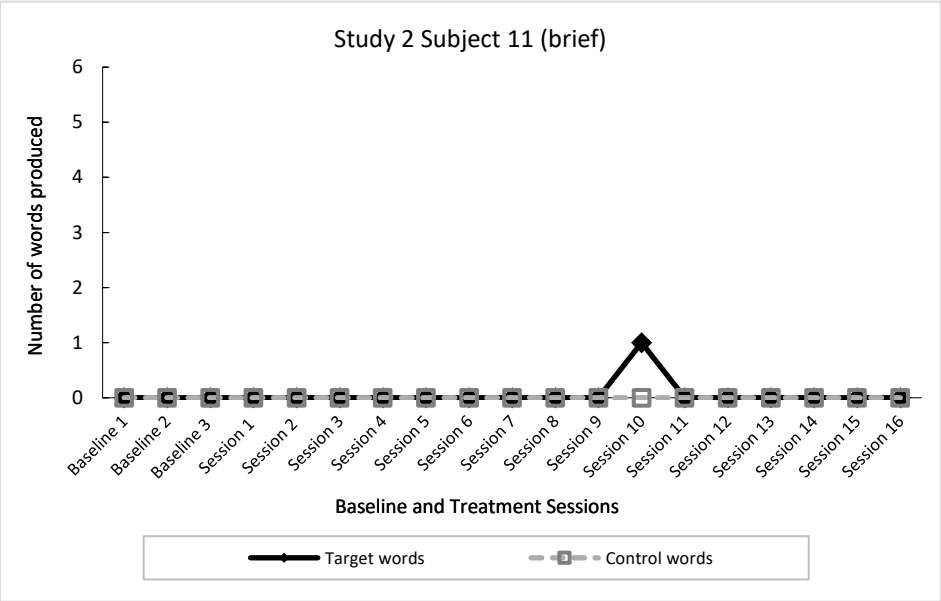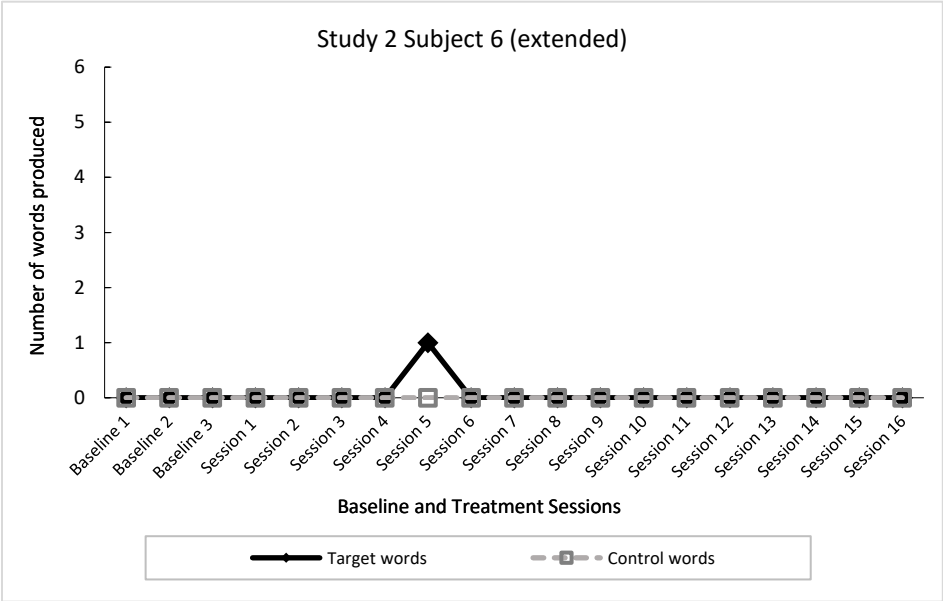

Study 2 Subject 8 (extended)

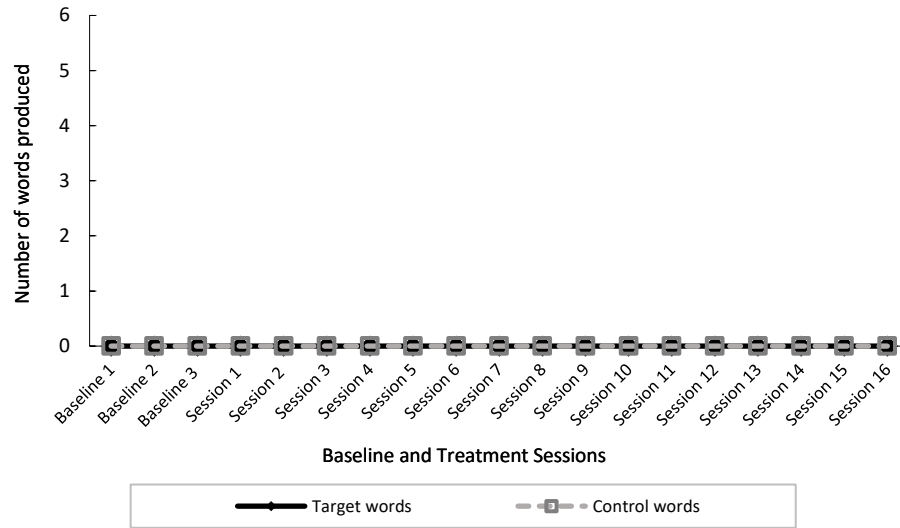

Study 2 Subject 10 (extended)

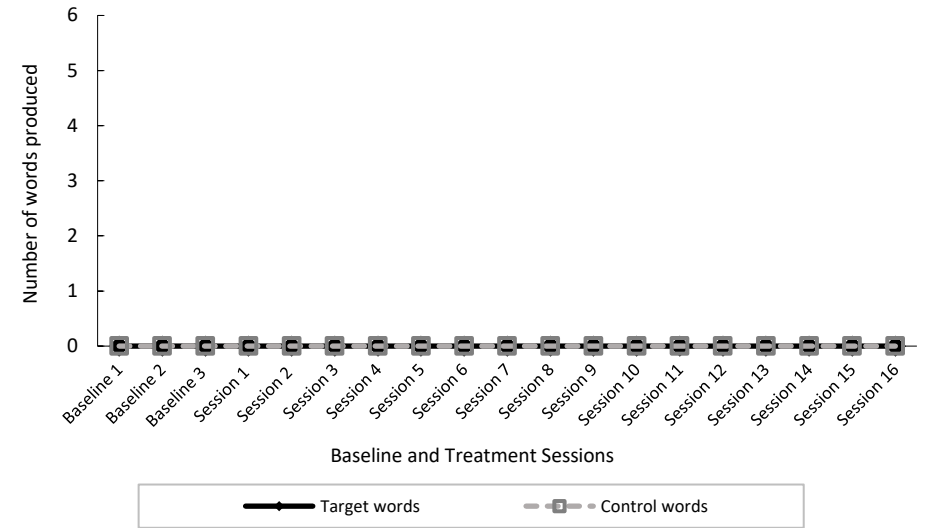

Study 2 Subject 12 (extended)

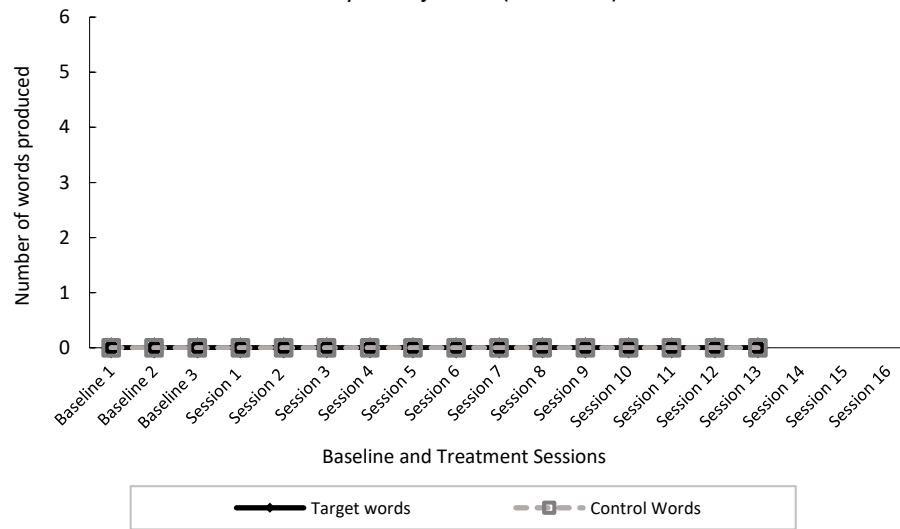

Study 2 Subject 17 (extended)

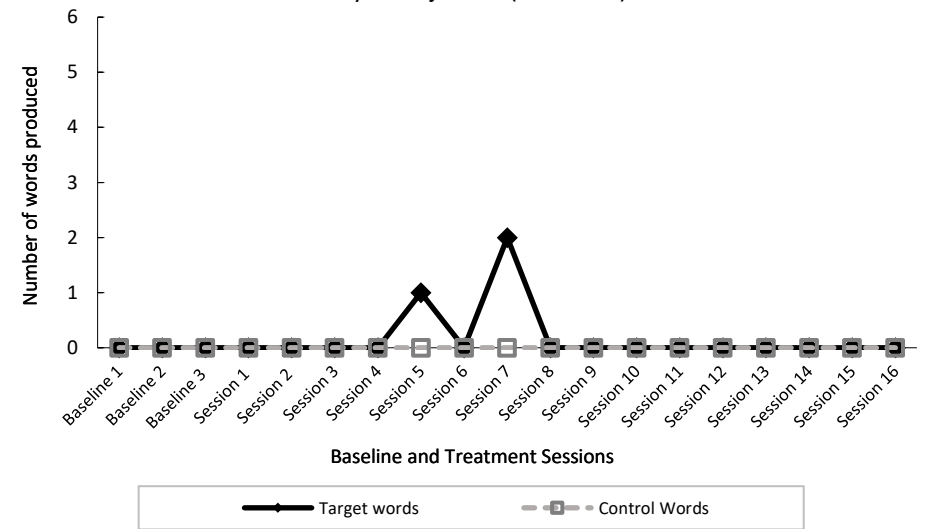

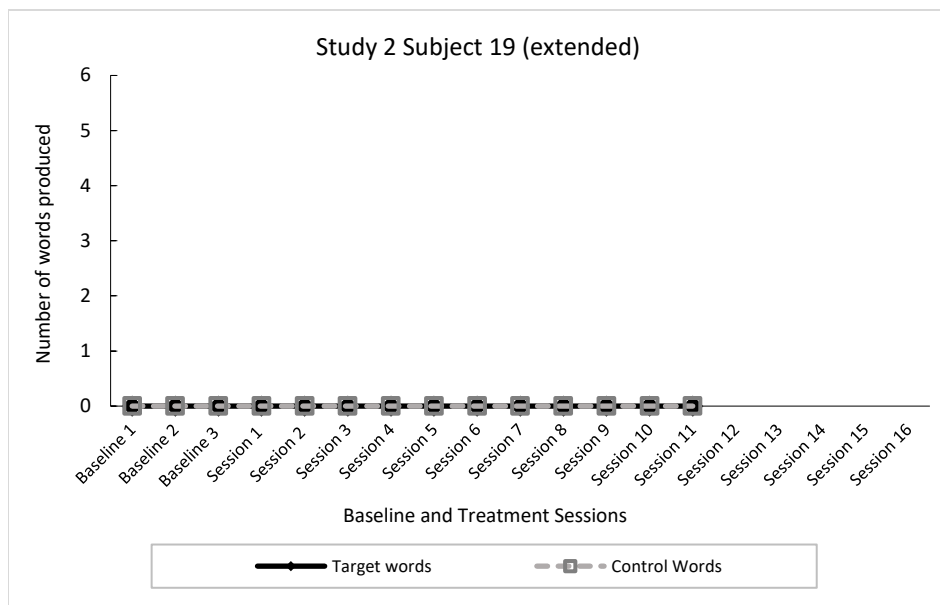

Supplement: Supplementary file 2 [file 1]
